# Supplementary material for: Type I Interferon induces Keratinocytes Necroptosis via the ZBP1-MLKL Axis in Oral Lichen Planus
Source: Research Square preprint supplement (doi:10.21203/rs.3.rs-7981446/v1), 2025-11-17
Supplement: Supplementary file 1 [file 7cc5ff2d5724b851eacd6bad.docx]

**The sources of primary antibodies used in this research** (dilutions according to manufacturers’ instructions):

β-Actin (Abclonal AC026)

Cytokeratin 4 (Abcam ab51599)

Cytokeratin 14 (Abcam ab7800)

MLKL-phospho-S358 (Abcam ab187091)

MLKL (Abclonal A19685)

Cleaved N-terminal GSDMD (Abcam ab215203)

Cleaved Caspase 3 (Cell Signaling 9661S)

ZBP1 (Adipogen AG-20B-0010-C100 for mIHC/IF, Cell Signaling 60968S for WB)

VINCULIN (Abcam, ab219649)

**The primer sequence used in this research：**

qPCR

| primer name | sequence |
| --- | --- |
| IFNA1-F | CTCATACACCAGGTCACGCT |
| IFNA1-R | GTGTAAAGGTGCACATGACG |
| ACTB-F | CTTCGCGGGCGACGAT |
| ACTB-R | ACATAGGAATCCTTCTGACCCA |

Generation of ZBP1 overexpression stable cell line

| primer name | sequence |
| --- | --- |
| ZBP1-3×FLAG-F | CAAGCACTGGGAATGAGGAC |
| ZBP1-3×FLAG-R | CTTCTGGGCGGTAAATCGTC |

Generation of ZBP1 knockout stable cell line

| primer name | sequence |
| --- | --- |
| CTRL-T | GATCTGTTCTCCGAACGTGTCACGTTTCAAGAGAACGTGACACGTTCGGAGAATTTTTTC |
| CTRL-B | AATTGAAAAAATTCTCCGAACGTGTCACGTTCTCTTGAAACGTGACACGTTCGGAGAACA |
| shRNA-ZBP1-1-T | GATCCAGCAAAGTCAGCCTCAATTATCTCGAGATAATTGAGGCTGACTTTGCTTTTTTT |
| shRNA-ZBP1-1-B | AATTAAAAAAAGCAAAGTCAGCCTCAATTATCTCGAGATAATTGAGGCTGACTTTGCTG |
| shRNA-ZBP1-2-T | GATCCGCAGCAACATGCAGCTACAATTCTCGAGAATTGTAGCTGCATGTTGCTGTTTTTT |
| shRNA-ZBP1-2-B | AATTAAAAAACAGCAACATGCAGCTACAATTCTCGAGAATTGTAGCTGCATGTTGCTGCG |
| shRNA-ZBP1-3-T | GATCCGTCCAAAGCATGGACGATTTACCTCGAGGTAAATCGTCCATGCTTTGGATTTTTT |
| shRNA-ZBP1-3-B | AATTAAAAAATCCAAAGCATGGACGATTTACCTCGAGGTAAATCGTCCATGCTTTGGACG |
